# Supplementary material
Source: Springer Nature journal article supplement (https://www.springermedizin.de/resource/supplementary/12885_2001_10_MOESM4_ESM.pdf/9460004)

**LoVo****DLD-1****0****4****15****39****0****7****27****58****(PDL)****MRP****mdr-1****G3PDH**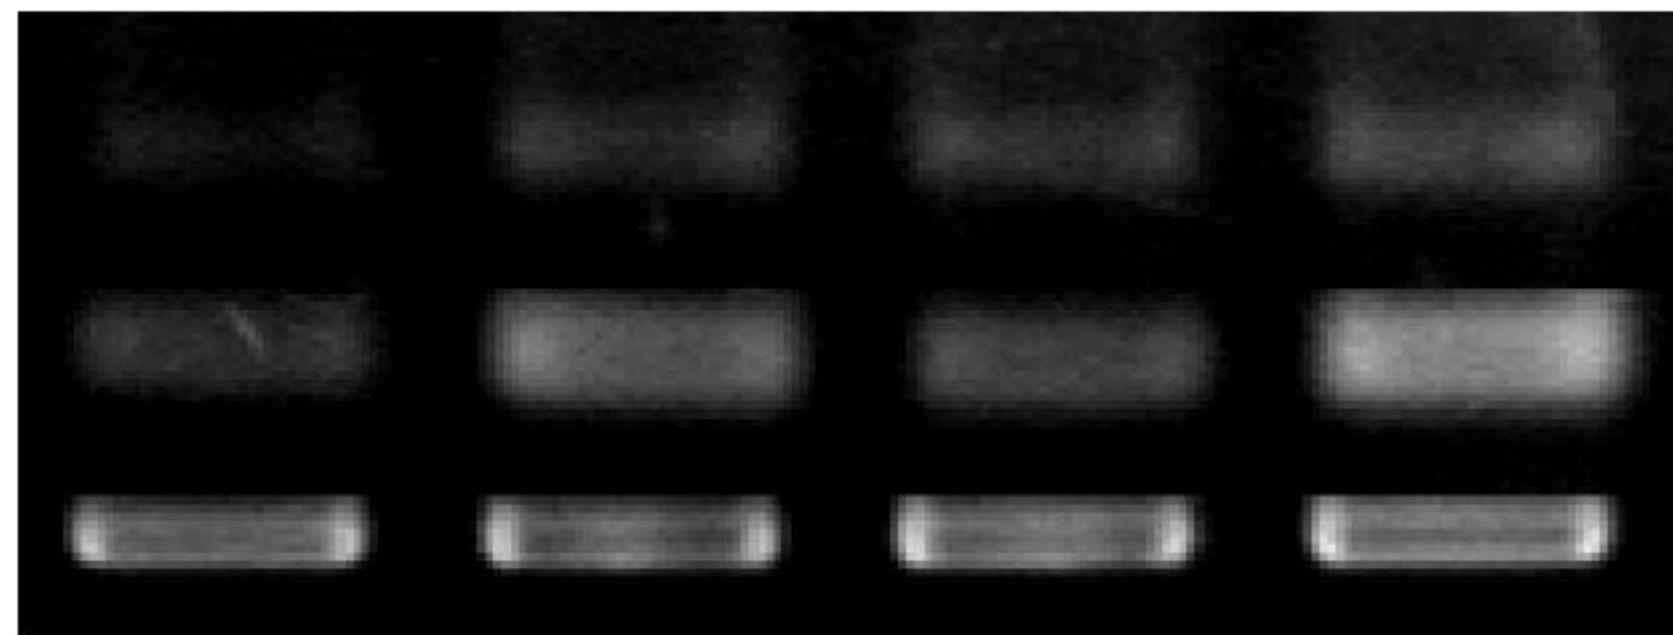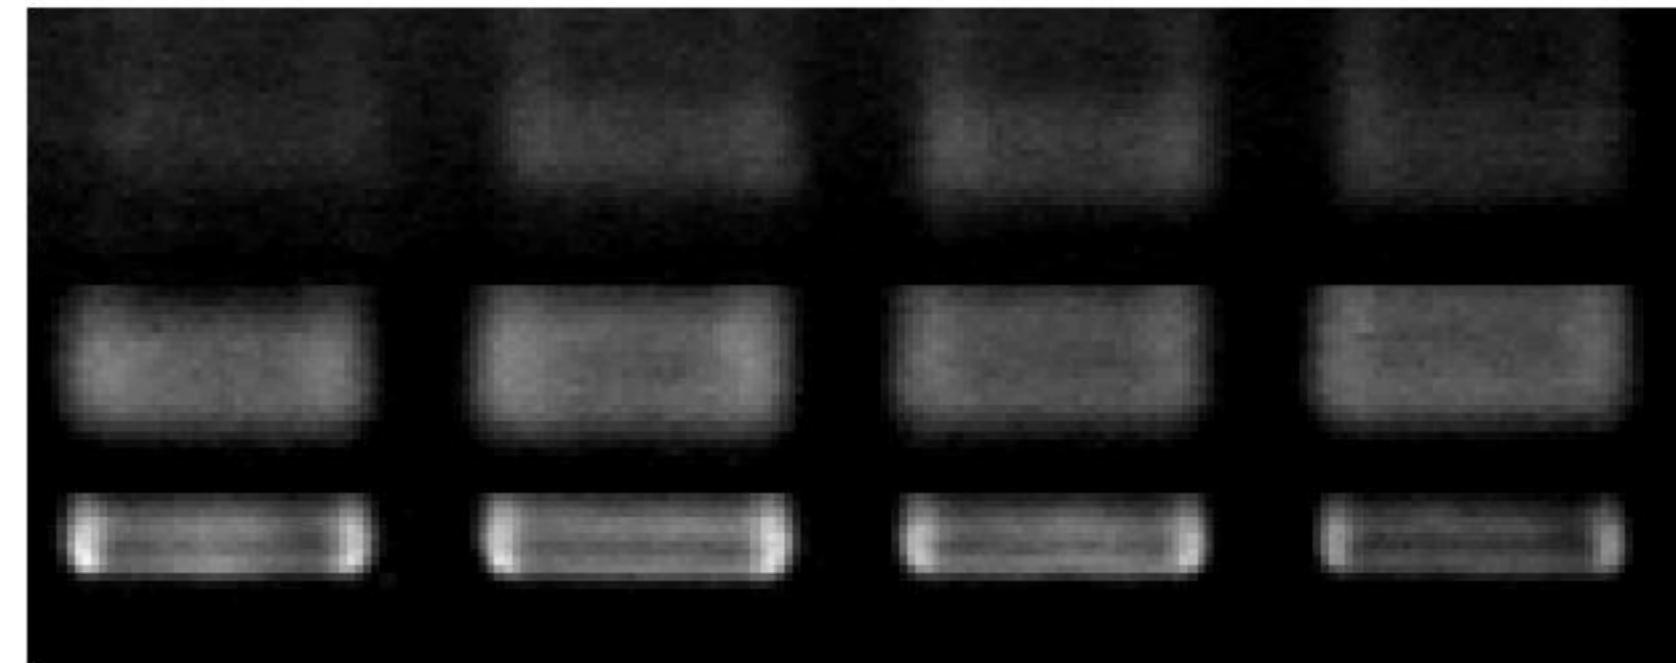

Supplement: MOESM4 [file 9460004]
